# Supplementary material for: Comparison of ECHAM5/MESSy Atmospheric Chemistry (EMAC) Simulations of the Arctic winter 2009/2010 and 2010/2011 with Envisat/MIPAS and Aura/MLS Observations
Source: Copernicus journal article supplement (doi:10.5194/acp-2017-1190), 2018-01-22
Supplement: Supplementary file [file acp-2017-1190-AC1-supplement.pdf]

## **Reply to Referee 1 Comments - Figures**

**Manuscript-No: acp-2017-1190**

**Comparison of ECHAM5/MESSy Atmospheric Chemistry (EMAC)  
Simulations of the Arctic winter 2009/2010 and 2010/2011 with  
Envisat/MIPAS and Aura/MLS Observations**

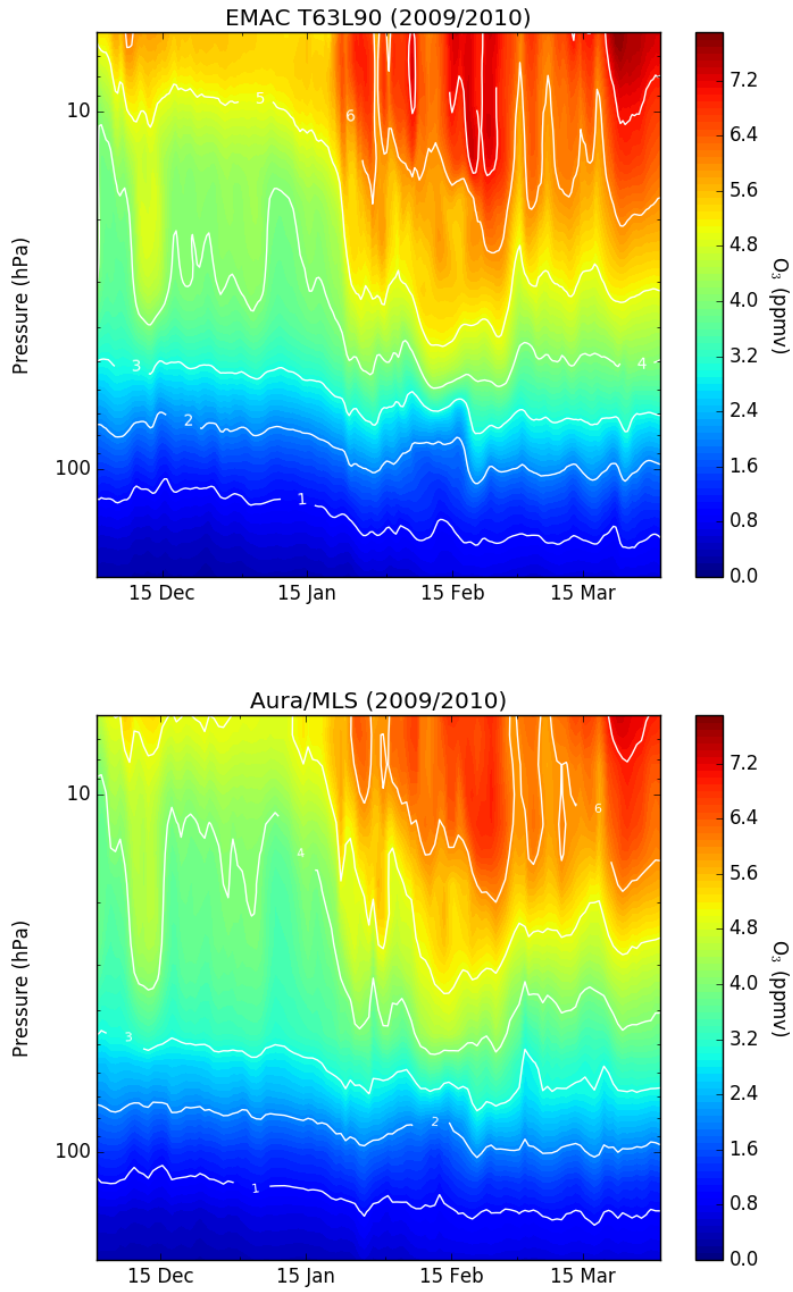

Figure 1: Temporal evolution of daily mean  $O_3$  at northern high latitudes (averaged over  $70-90^\circ N$ ) as function of pressure as simulated by EMAC T63L90 and observed by Aura/MLS for the Arctic winter 2009/2010.

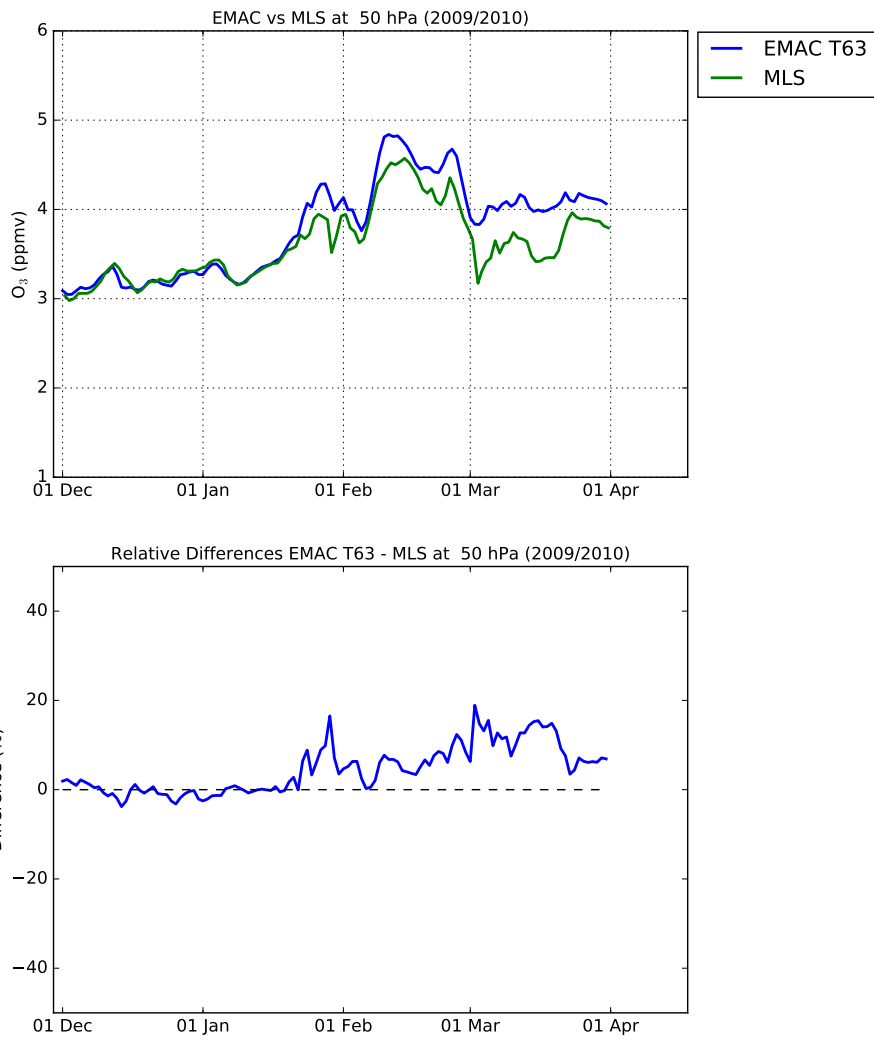

Figure 2: Time series of O<sub>3</sub> from Aura/MLS measurements (green) and from the EMAC T63L90 (blue) simulation at ~50 hPa averaged over 70-90°N for the Arctic winter 2009/2010.

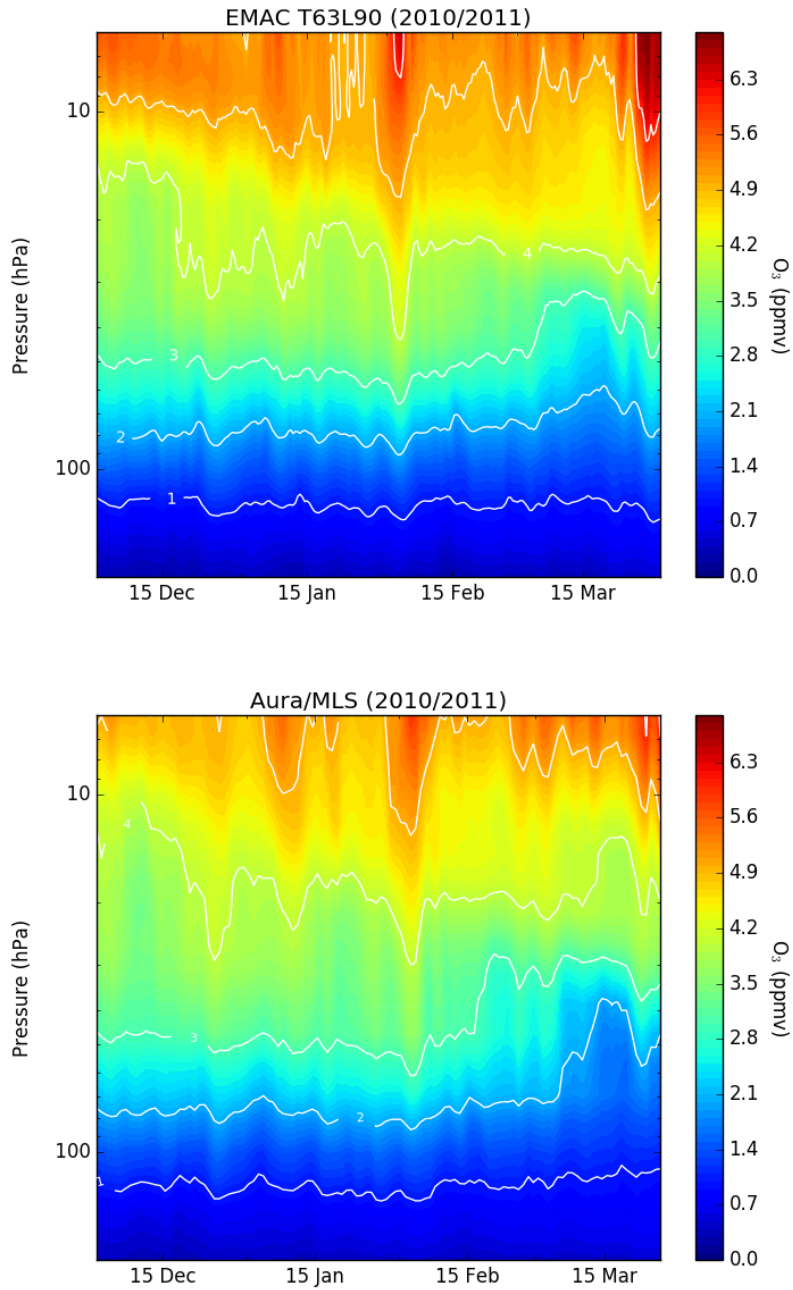

Figure 3: Temporal evolution of daily mean  $O_3$  at northern high latitudes (averaged over  $70-90^\circ N$ ) as function of pressure as simulated by EMAC T63L90 and observed by Aura/MLS for the Arctic winter 2010/2011.

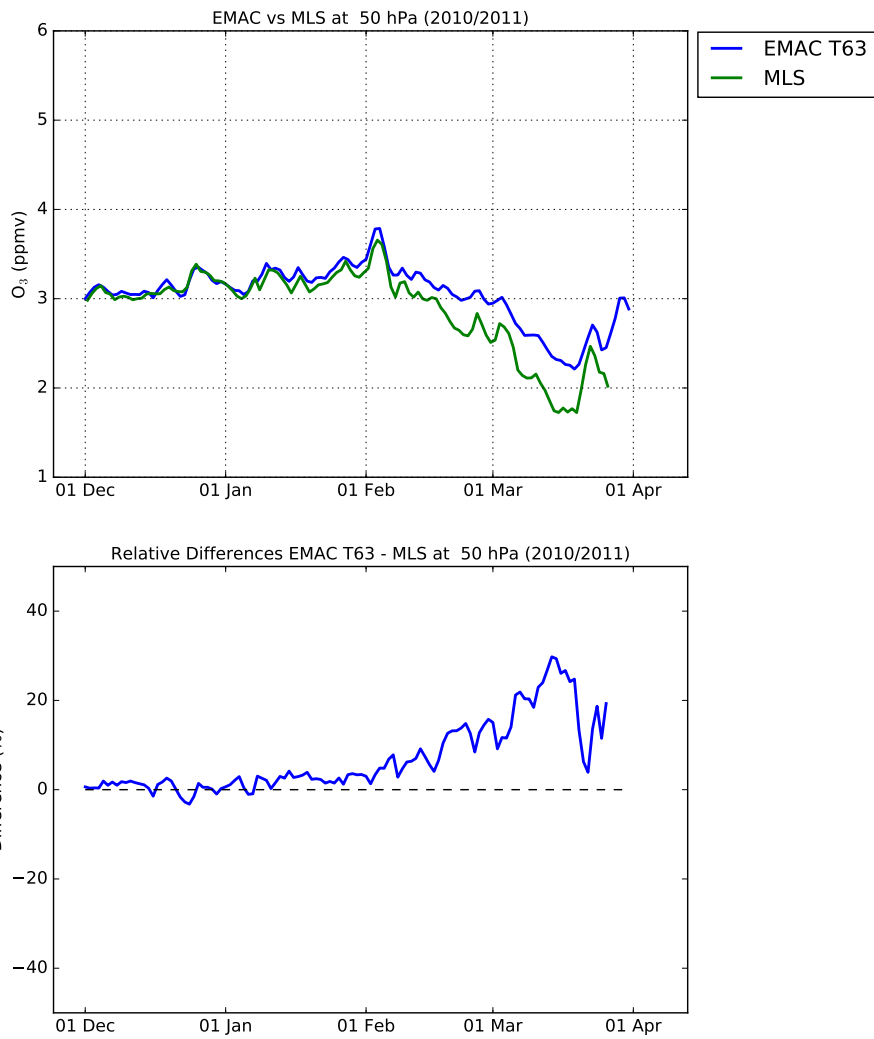

Figure 4: Time series of O<sub>3</sub> from Aura/MLS measurements (green) and from the EMAC T63L90 (blue) simulation at ~50 hPa averaged over 70-90°N for the Arctic winter 2010/2011.

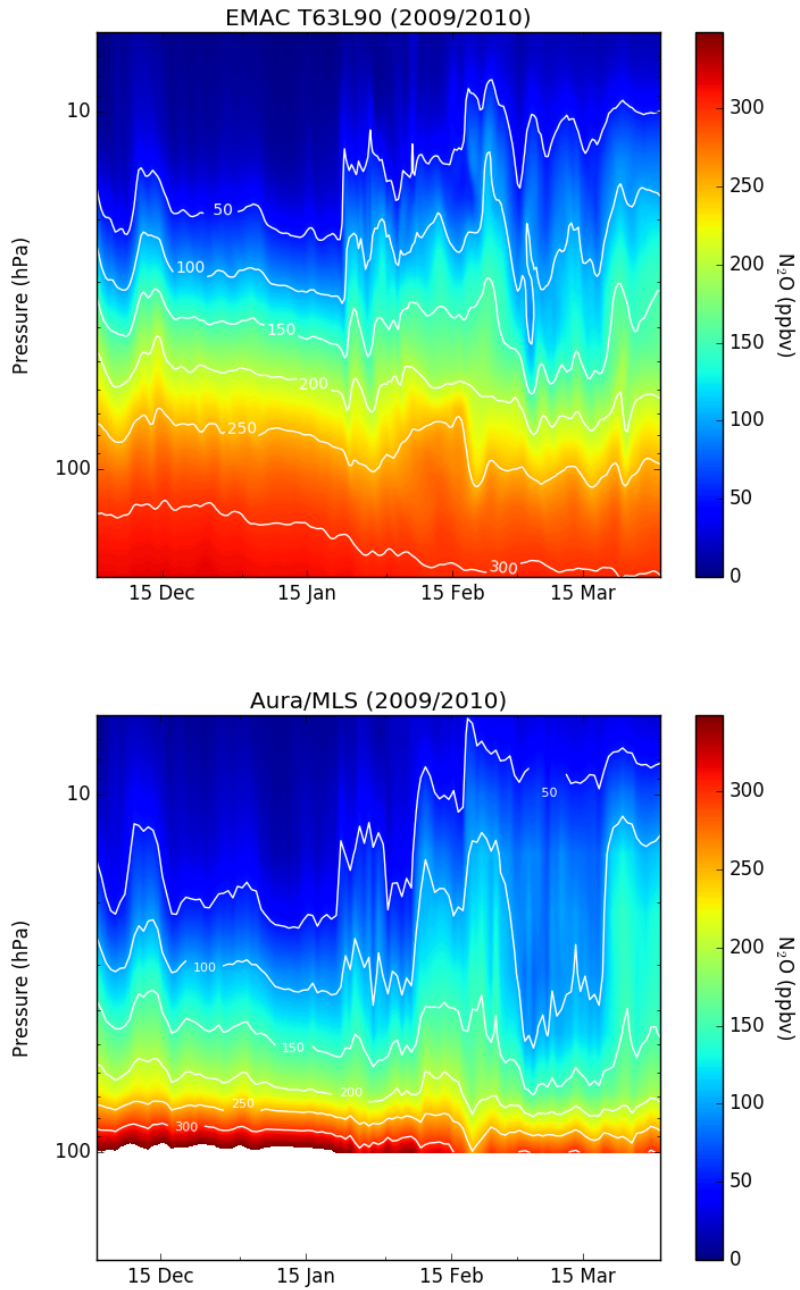

Figure 5: Temporal evolution of daily mean  $\text{N}_2\text{O}$  at northern high latitudes (averaged over  $70\text{-}90^\circ\text{N}$ ) as function of pressure as simulated by EMAC T63L90 and observed by Aura/MLS for the Arctic winter 2009/2010.

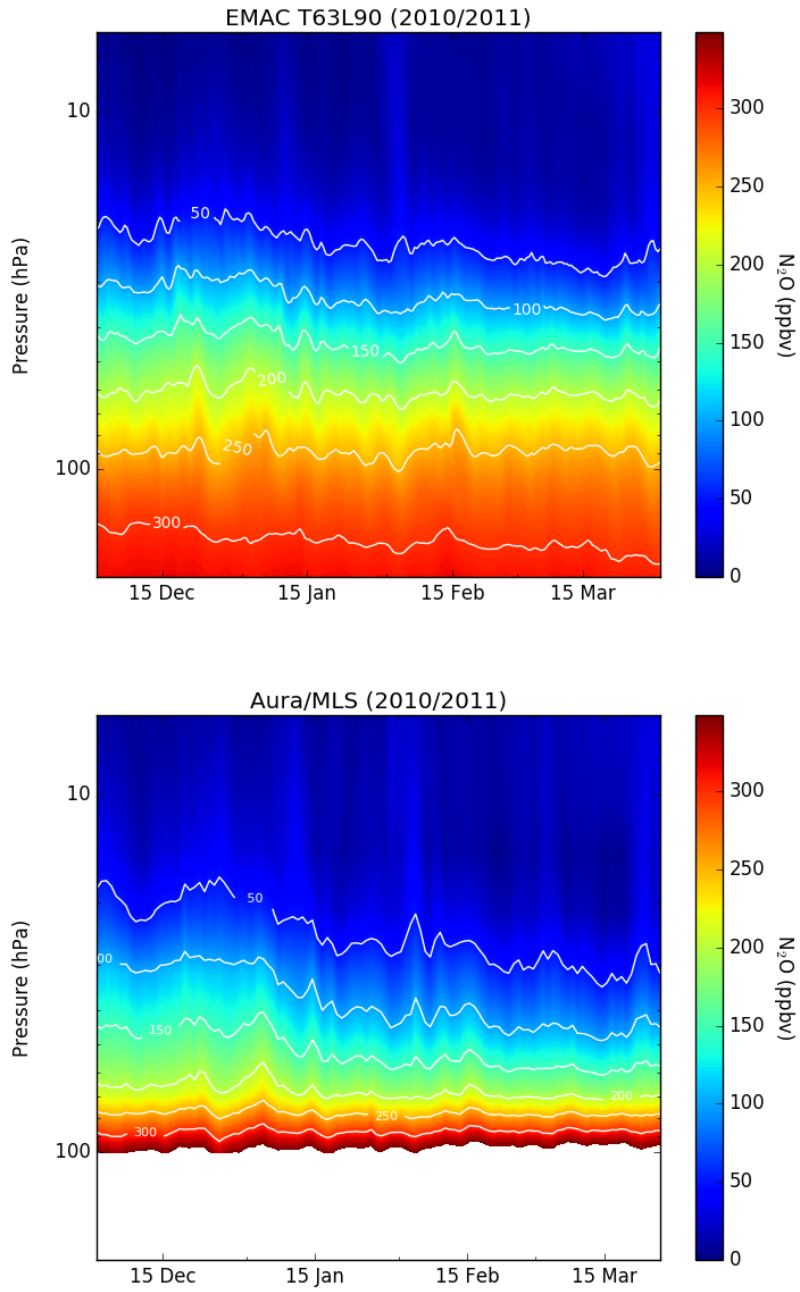

Figure 6: Temporal evolution of daily mean N<sub>2</sub>O at northern high latitudes (averaged over 70-90°N) as function of pressure as simulated by EMAC T63L90 and observed by Aura/MLS for the Arctic winter 2010/2011.
