# Supplementary material for: Comparison of ECHAM5/MESSy Atmospheric Chemistry (EMAC) Simulations of the Arctic winter 2009/2010 and 2010/2011 with Envisat/MIPAS and Aura/MLS Observations
Source: Copernicus journal article supplement (doi:10.5194/acp-2017-1190), 2018-01-22
Supplement: Supplementary file [file acp-2017-1190-AC2-supplement.pdf]

## **Reply to Referee 2 Comments - Figures**

**Manuscript-No: acp-2017-1190**

**Comparison of ECHAM5/MESSy Atmospheric Chemistry (EMAC)  
Simulations of the Arctic winter 2009/2010 and 2010/2011 with  
Envisat/MIPAS and Aura/MLS Observations**

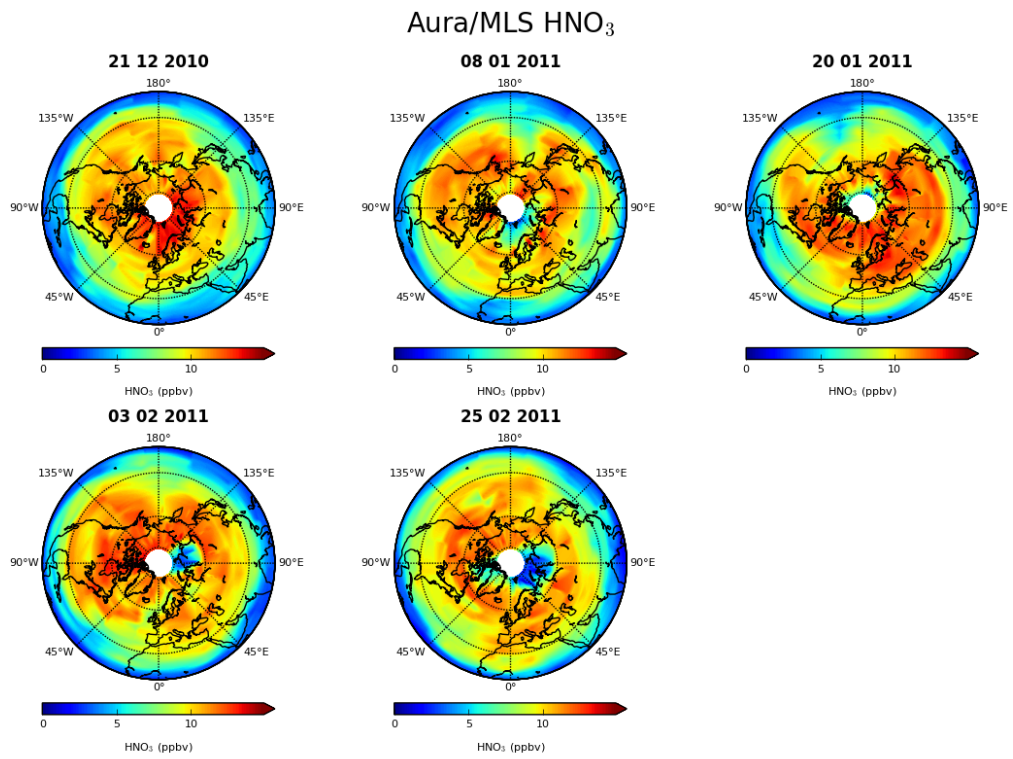

Figure 1: Distribution of HNO<sub>3</sub> as observed by Aura/MLS for 21 December 2010, 3 and 25 February 2011 at 34 hPa (~21km). Note: no data for 28 March 2011.

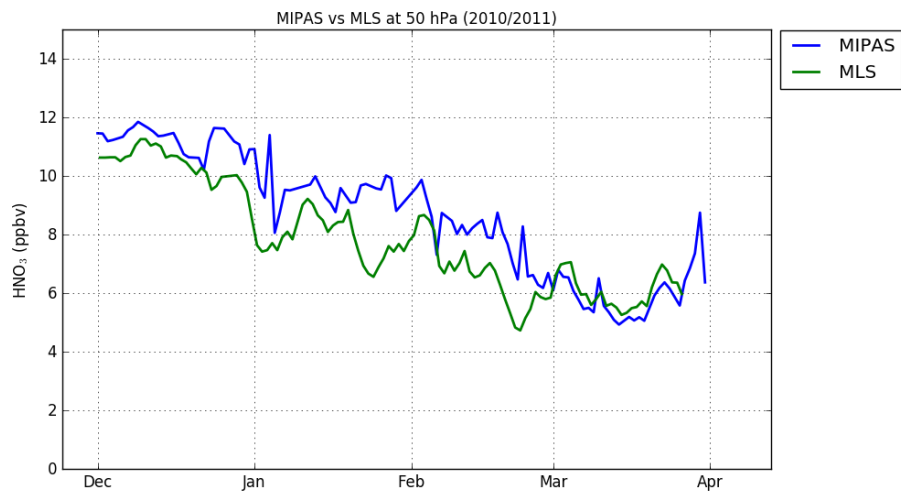

Figure 2: Time series of HNO<sub>3</sub> (at 50 hPa) from MIPAS (blue) and Aura/MLS (green) for the Arctic winter 2010/2011 (1 December to 31 March, 70-90°N).
